# Supplementary material
Source: PubMed Central journal article supplement (PMC5667357)
Supplement: NIHMS890907-supplement-supplement_1.pdf [file NIHMS890907-supplement-supplement_1.pdf]

Supplementary Materials:

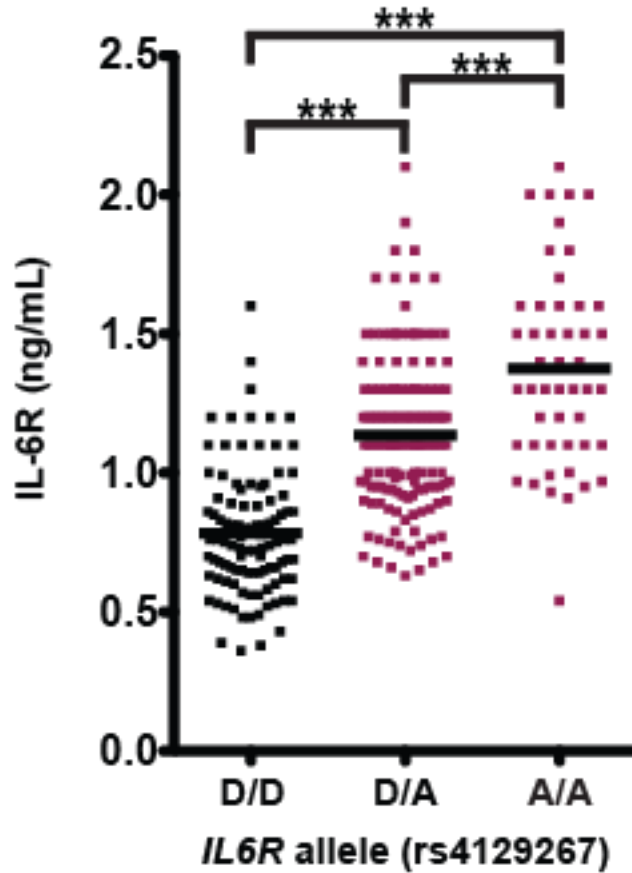

**Fig. S1. sIL6R levels in CSF by genotype at D358A.** Soluble IL-6R concentration is higher in CSF of *IL6R* A358 carriers compared to those with *IL6R* D358 genotype in ADNI samples. Line = median, D/D n= 102, D/A n= 146, A/A n= 48. Comparisons between all combinations of groups \*\*\* p<0.001 (two-sample t-test  $\leq 5.31 \times 10^{-5}$ ). Magenta : A358 allele carriers.

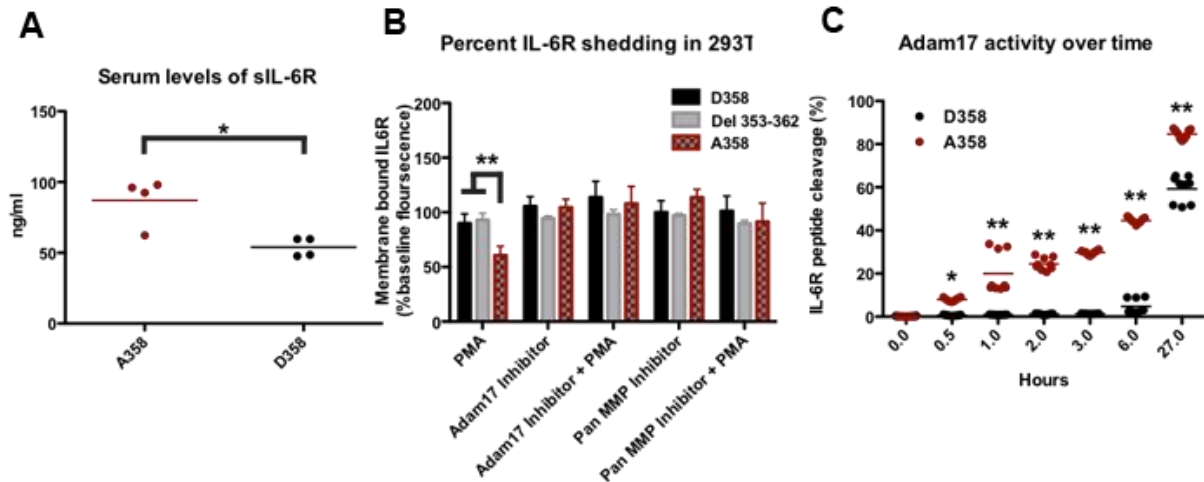

**Fig. S2. Increased shedding of A358 IL-6R.** (A) A358 is associated with increased circulating levels of sIL-6R in healthy donors. Blood from four healthy genotyped donors was collected. Circulating levels (ng/ml) of sIL-6R in serum was measured by ELISA. (B) A358 enhances ADAM17 mediated shedding. Membrane bound IL-6R was analyzed by FACS. 293T cells were transfected with D358, A358 and ADAM17 inactive del353-362 constructs of IL-6R. After 48 hours of transfection, cells were treated with/without 20uM of TAPI-2 (ADAM 17 Inhibitor) or with/without 100nM of GM 6001 (a pan-MMP inhibitor) for 60 minutes prior to treatment with/without 100nM PMA for 60 minutes. The mean fluorescence intensity relative to untreated cells (where untreated cells are given a value of 100%) of four individual experiments is shown. Error bars are standard deviation. (C) Adam 17 at 2.5ug/ml and D358 or A358 IL-6R peptides at 10 uM concentration were added in an assay buffer (25mM Tris, 2.5 uM ZnCl<sub>2</sub>, 0.005 Brij-35 (v/v) pH 9.0) and incubated at 37° C for indicated time. Data represents the activity of Adam 17 over the time on the IL-6R peptides. We quantitated cleaved and uncleaved product by checking area under the curve at expected Masses by Mass-spectrometry.

Results shows percent cleaved product (area under the curve) considering total (cleaved + uncleaved area under the curve) as 100%. p value  $<0.05= *$ ,  $<0.005=**$ ,  $<0.0005=***$ .

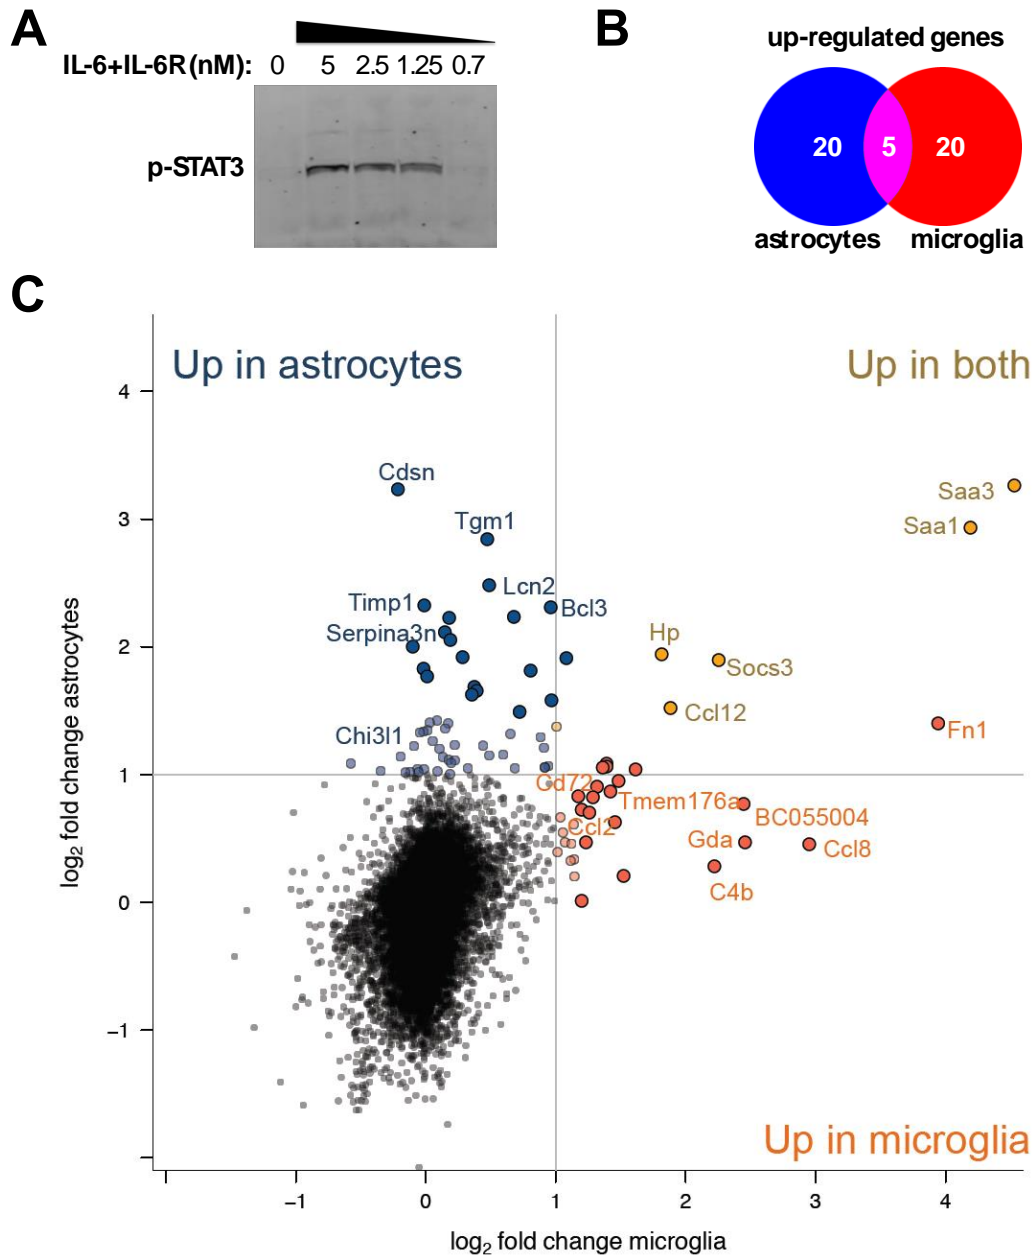

**Fig. S3. IL-6 responsive genes in astrocyte and microglia co-culture.** (A) Immunoblot of p-STAT3 of mouse astrocyte and microglia co-cultures 15 minutes after treatment with a range of IL-6 and sIL-6R (0 to 5nM) concentrations. (B) Five genes are in the top 25 differentially expressed gene sets in both astrocyte and microglia enriched cell types. (C) Fold change plot for IL-6 and sIL-6R treated astrocytes and microglia. Average log<sub>2</sub> (fold change) for microglia (x-axis) and astrocyte (y-axis) samples. Genes in color are

significantly up-regulated upon treatment of IL-6 and sIL-6R (adjusted p-value < 0.01, |fold change| > 2). Genes in bold are the top 25 genes (for each cell type, by fold change) up-regulated by IL-6 and sIL-6R treatment. Genes in gold are in the top 25 in both cell types.

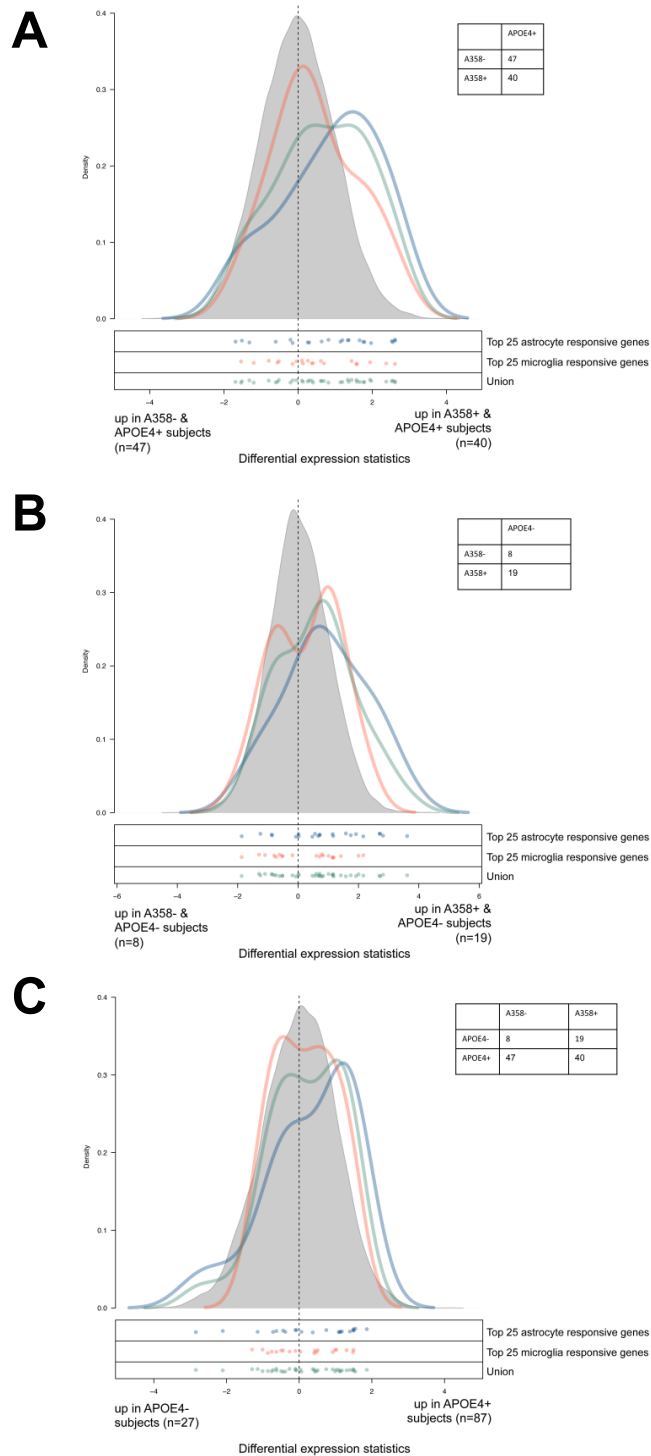

**Fig. S4. Density plots for three comparisons in the AD microarray samples.** Density of the t-statistics for all genes in human AD patients is shown in grey. The t-statistic densities of the astrocyte (blue) and microglia (orange) gene sets are also plotted. Individual gene

statistics are plotted below the density plots. (A) IL-6 set enriched in patients with AD, APOE4, and *IL6R* risk variant. Each t-statistic is measuring the relative difference between the average expression in patients who carry A358 and APOE4 and patients who carry APOE4 but not A358 (after adjusting for sex and batch). Note that the IL-6 responsive gene set densities are shifted toward the right of the plot, indicating that the expression of these genes is higher in the A358 carriers. The astrocyte set has the highest level of enrichment among A358 carriers with APOE4 and disease with 34.8% of genes up-regulated in this set (ROAST p-value = 0.019). The microglia (p-value = 0.107) gene set is not enriched among A358 carriers. (B) IL-6 set enriched in patients with AD, APOE3, and *IL6R* risk variant. Each t-statistic is measuring the relative difference between the average expression in patients who carry A358 and are APOE4- and patients who lack both risk alleles (after adjusting for sex and batch). Note that the IL-6 responsive gene set densities are slightly shifted toward the right of the plot, indicating that the expression of these genes is slightly higher in the A358 carriers. The astrocyte set has the highest level of enrichment among A358 carriers with APOE3 and disease with 34.8% of genes up-regulated in this set (ROAST p-value = 0.040). The microglia gene set is not enriched (p-value = 0.065). (C) IL-6 set not enriched in AD patients who carry A358 and APOE4 versus AD patients who carry A358 and APOE2/3. Each t-statistic is measuring the relative difference between the average expression in patients who carry A358 and APOE4 and patients who carry A358 and APOE2/3 (after adjusting for sex and batch). Note that the IL-6 responsive gene set densities are not shifted toward the right of the plot, indicating that the expression of these genes is not different in the APOE4 carriers (p-value  $\geq$  0.135).

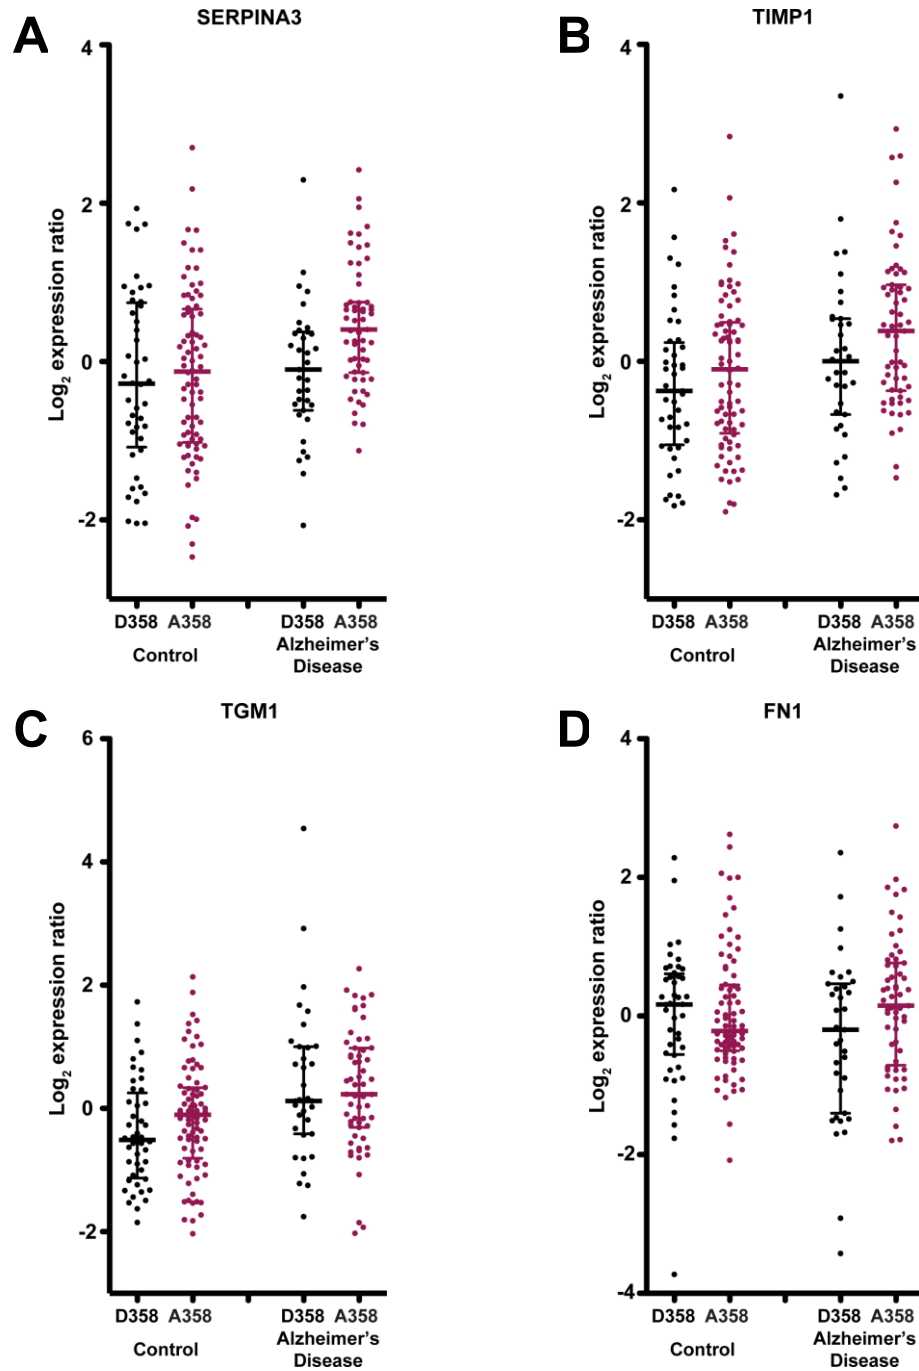

**Fig. S5. Gene expression of individual genes of the IL-6 responsive score.** (A-D) Gene expression for the four genes that constitute the IL-6 responsive score stratified by disease status and *IL6R* genotype. Error bars represent  $\pm 1$  standard deviation from the mean.



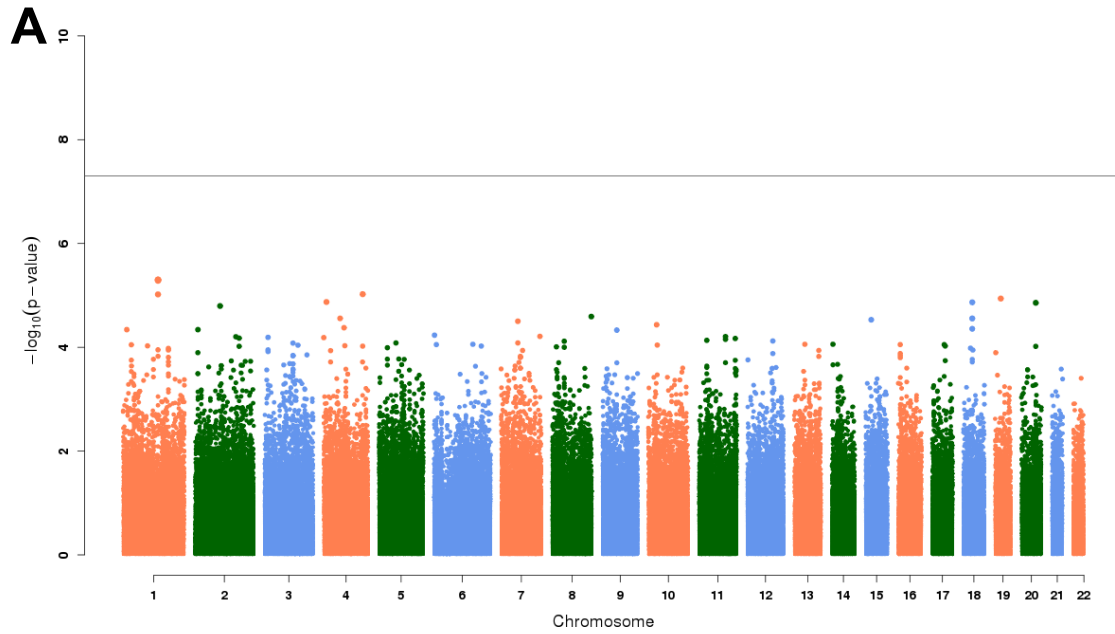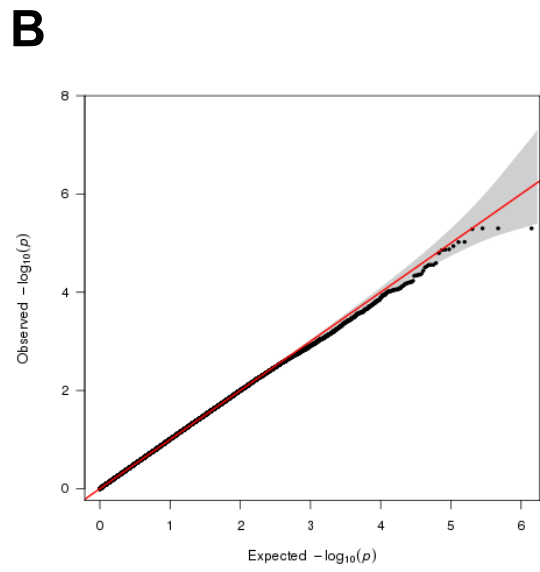

**Fig. S6. Manhattan plot of genome-wide p-values of primary study.** (A) Manhattan plot of the genome-wide association results for the primary study. (B) QQ plot comparing observed genome-wide association p-values with the expectation under the null hypothesis of no association. No evidence of inflation of the test statistic was seen (genomic inflation factor,  $\lambda = 1.01$ )



| Probed        | Mouse <sup>2</sup><br>EntrezID | Human <sup>2</sup><br>EntrezID | Mouse <sup>2</sup><br>Symbol | GeneName                                                                        | log2FCin <sup>2</sup><br>Astrocytes <sup>2</sup> | Adjusted <sup>2</sup> -value <sup>2</sup><br>inAstrocytes <sup>2</sup> | log2FCin <sup>2</sup><br>Astrocytes(PCR) <sup>2</sup> | log2FCin <sup>2</sup><br>Microglia <sup>2</sup> | Adjusted <sup>2</sup> -value <sup>2</sup><br>inMicroglia <sup>2</sup> | log2FCin <sup>2</sup><br>Microglia(PCR) <sup>2</sup> |
|---------------|--------------------------------|--------------------------------|------------------------------|---------------------------------------------------------------------------------|--------------------------------------------------|------------------------------------------------------------------------|-------------------------------------------------------|-------------------------------------------------|-----------------------------------------------------------------------|------------------------------------------------------|
| A_55_P1953169 | 20210                          | NA                             | Saa3                         | serumamyloidA3                                                                  | 3.26358                                          | 2.92E-14                                                               | 3.942                                                 | 4.529                                           | 2.21E-17                                                              | 4.067                                                |
| A_52_P318673  | 20208                          | 6288                           | Saa1                         | serumamyloidA1                                                                  | 2.9325                                           | 2.66E-15                                                               | -0.4773                                               | 4.19                                            | 6.46E-19                                                              | 1.527                                                |
| A_52_P627816  | 21816                          | 7051                           | Tpm1                         | transglutaminase1_K1polypeptide                                                 | 2.83847                                          | 1.02E-21                                                               | 2.867                                                 | 0.4723                                          | 0.004356                                                              | 1.897                                                |
| A_55_P2048607 | 15439                          | 3240                           | Hb                           | haptoglobin                                                                     | 1.93923                                          | 2.03E-16                                                               | 2.229                                                 | 1.814                                           | 1.15E-14                                                              | 3.625                                                |
| A_51_P474459  | 12702                          | 9021                           | Socs3                        | suppressorofcytokinesignaling3                                                  | 1.89115                                          | 2.04E-17                                                               | NA                                                    | 2.252                                           | 7.11E-19                                                              | NA                                                   |
| A_51_P110301  | 12266                          | 718                            | C3                           | complementcomponent3                                                            | 1.81132                                          | 2.69E-15                                                               | 1.06                                                  | 0.8055                                          | 7.60E-06                                                              | 0.267                                                |
| A_55_P1984556 | 20293                          | 6347                           | Ccl12                        | chemokine(C-C motif)ligand12                                                    | 1.51534                                          | 4.13E-12                                                               | NA                                                    | 1.882                                           | 1.32E-13                                                              | NA                                                   |
| A_55_P2130178 | 14268                          | 2335                           | Fn1                          | fibronectin1                                                                    | 1.4                                              | 2.64E-08                                                               | 0.812                                                 | 3.941                                           | 4.16E-19                                                              | 2.561                                                |
| A_51_P212782  | 16176                          | 3553                           | Ilf1b                        | interleukin1beta                                                                | 0.8276                                           | 0.00413                                                                | 0.6914                                                | 1.172                                           | 0.001575                                                              | 0.6835                                               |
| A_52_P638459  | 20304                          | 6352                           | Ccl5                         | chemokine(C-C motif)ligand5                                                     | 0.5707                                           | 0.008417                                                               | 0.6579                                                | 1.929                                           | 1.29E-09                                                              | 2.155                                                |
| A_51_P464703  | 20307                          | 6355                           | Ccl8                         | chemokine(C-C motif)ligand8                                                     | 0.4508                                           | 3.21E-05                                                               | 2.204                                                 | 2.949                                           | 1.53E-24                                                              | 3.731                                                |
| A_51_P283499  | 13491                          | 1815                           | Drd4                         | dopamine receptorD4                                                             | 0.4464                                           | 0.005563                                                               | -1.228                                                | 0.6853                                          | 0.0009103                                                             | -0.2283                                              |
| A_55_P2186027 | 14433                          | NA                             | Gapdh                        | glyceraldehyde-3-phosphate1dehydrogenase                                        | 0.4036                                           | 0.0003672                                                              | -0.2006                                               | 0.4141                                          | 0.003306                                                              | 0.04353                                              |
| A_51_P275146  | 12491                          | 948                            | Cd36                         | CD36antigen                                                                     | -0.4241                                          | 0.003393                                                               | -1.644                                                | -1.471                                          | 4.25E-11                                                              | -2.114                                               |
| A_55_P2158990 | 16476                          | 3725                           | Jun                          | JunBncogene                                                                     | -0.5505                                          | 0.0001527                                                              | -0.05985                                              | -0.7092                                         | 0.02663                                                               | -0.173                                               |
| A_55_P2025153 | 15289                          | 3146                           | Hmgbl1                       | highmobilitygroupboxL1                                                          | -1.286                                           | 7.79E-08                                                               | 0.0857                                                | -0.6917                                         | 0.006691                                                              | -0.1057                                              |
| A_55_P2020472 | 70432                          | 55680                          | Rufy2                        | RUNandFYVEdomain-containing2                                                    | -1.293                                           | 1.32E-10                                                               | 0.1174                                                | -0.733                                          | 0.0001447                                                             | -0.01272                                             |
| A_55_P2183172 | 19684                          | 5962                           | Rdx                          | radixin                                                                         | -1.487                                           | 3.37E-09                                                               | -0.02185                                              | -0.6208                                         | 0.01613                                                               | -0.2222                                              |
| A_55_P2190994 | 386463                         | 1041                           | Cdsn                         | corneodesmosin                                                                  | 3.23403                                          | 8.53E-21                                                               | 3.778                                                 | -0.2146                                         | 0.461                                                                 | -1.091                                               |
| A_55_P2070869 | 16819                          | 3934                           | Lcn2                         | lipocalin2                                                                      | 2.48001                                          | 1.27E-19                                                               | NA                                                    | 0.4878                                          | 0.004142                                                              | NA                                                   |
| A_55_P1985850 | 21857                          | 7076                           | Timp1                        | tissueinhibitorofmetalloproteinase1                                             | 2.32311                                          | 5.48E-23                                                               | 2.956                                                 | -0.01194                                        | 0.9691                                                                | 2.421                                                |
| A_55_P2066116 | 12051                          | 602                            | Bcl3                         | Bcellleukemia/lymphoma3                                                         | 2.30501                                          | 2.11E-12                                                               | NA                                                    | 0.9602                                          | 0.0007113                                                             | NA                                                   |
| A_51_P444447  | 12609                          | 1052                           | Cebpd                        | CCAAT/enhancerbindingprotein(C/EBP)delta                                        | 2.23287                                          | 5.89E-17                                                               | NA                                                    | 0.6761                                          | 0.00034                                                               | NA                                                   |
| A_51_P159453  | 20716                          | 12                             | Serpina3n                    | serpineforysteine1peptidaseinhibitor,kladeA,member3N                            | 2.22307                                          | 1.55E-22                                                               | 3.861                                                 | 0.1787                                          | 0.2262                                                                | 0.09047                                              |
| A_55_P2039284 | 15507                          | 3315                           | Hspb1                        | heatshockprotein1                                                               | 2.11388                                          | 2.88E-19                                                               | NA                                                    | 0.1457                                          | 0.5145                                                                | NA                                                   |
| A_55_P1953341 | 67701                          | 10406                          | Wfdc2                        | WAPfour-disulfidecoredomain2                                                    | 2.05118                                          | 1.10E-14                                                               | NA                                                    | 0.1892                                          | 0.5568                                                                | NA                                                   |
| A_52_P338956  | 104816                         | 374569                         | Aspg                         | asparaginasehomolog(S.terevisiae)                                               | 2.00063                                          | 2.58E-11                                                               | NA                                                    | -0.1007                                         | 0.8688                                                                | NA                                                   |
| A_51_P338443  | 57875                          | 51129                          | Angptl4                      | angiotensin-like4                                                               | 1.91434                                          | 1.99E-11                                                               | NA                                                    | 0.2831                                          | 0.4443                                                                | NA                                                   |
| A_51_P212754  | 21810                          | 7045                           | Tgfb1                        | transforminggrowthfactor,betalinduced                                           | 1.90746                                          | 1.33E-16                                                               | NA                                                    | 1.081                                           | 4.23E-09                                                              | NA                                                   |
| A_51_P374726  | 19288                          | 5806                           | Phk3                         | phox-relatedgene                                                                | 1.82445                                          | 1.58E-15                                                               | NA                                                    | -0.01836                                        | 0.9675                                                                | NA                                                   |
| A_51_P213336  | 108052                         | 6563                           | Slc14a1                      | solutecarrierfamily14,4(urea transporter),member1                               | 1.76706                                          | 1.27E-19                                                               | NA                                                    | 0.009055                                        | 0.9784                                                                | NA                                                   |
| A_55_P2050390 | 104010                         | 64405                          | Cdh22                        | cadherin2                                                                       | 1.68127                                          | 1.98E-12                                                               | NA                                                    | 0.3732                                          | 0.1099                                                                | NA                                                   |
| A_51_P501248  | 20698                          | 8877                           | Sphk1                        | sphingosinekinase1                                                              | 1.65491                                          | 9.68E-11                                                               | NA                                                    | 0.3918                                          | 0.167                                                                 | NA                                                   |
| A_52_P220879  | 21817                          | 7052                           | Tgm2                         | transglutaminase2_K2polypeptide                                                 | 1.62389                                          | 2.23E-13                                                               | 0.798                                                 | 0.354                                           | 0.08341                                                               | 0.1812                                               |
| A_55_P2017789 | 16190                          | 3566                           | Ilf4ra                       | interleukin1receptor,alpa                                                       | 1.57945                                          | 1.80E-11                                                               | NA                                                    | 0.9672                                          | 9.71E-06                                                              | NA                                                   |
| A_55_P2097279 | 18733                          | NA                             | Ilf1rb3                      | leukocyteimmunoglobulin-like1receptor,subfamilyB3(withTMandITIMdomains),member3 | 1.49114                                          | 2.04E-12                                                               | NA                                                    | 0.7208                                          | 0.0001032                                                             | NA                                                   |
| A_51_P144264  | 16598                          | 10365                          | Klf2                         | Kruppel-likefactor2(lung)                                                       | 1.367                                            | 2.37E-06                                                               | 0.4709                                                | 0.5379                                          | 0.1615                                                                | 0.5824                                               |
| A_55_P2041828 | 22152                          | 10381                          | Tubb3                        | tubulin,beta3classIII                                                           | 1.324                                            | 4.21E-07                                                               | 0.9723                                                | -0.5905                                         | 0.05518                                                               | -0.2726                                              |
| A_51_P268234  | 76527                          | 346433                         | H34                          | interleukin34                                                                   | 1.016                                            | 5.87E-09                                                               | 0.8387                                                | -0.1567                                         | 0.5678                                                                | -0.2283                                              |
| A_55_P1997756 | 16193                          | 3569                           | Ilf6                         | interleukin6                                                                    | 0.9761                                           | 6.24E-10                                                               | 2.162                                                 | -0.09943                                        | 0.7205                                                                | -1.473                                               |
| A_55_P1968068 | 22059                          | 7157                           | Trp53                        | transformationrelatedprotein53                                                  | 0.9219                                           | 2.92E-07                                                               | -0.1406                                               | 0.2153                                          | 0.2884                                                                | -0.4502                                              |
| A_55_P2093286 | 11815                          | 347                            | Apod                         | apolipoproteinD                                                                 | 0.7444                                           | 0.0008963                                                              | 0.7066                                                | -0.1981                                         | 0.6857                                                                | 1.42                                                 |
| A_52_P52303   | 14580                          | 2670                           | Gap                          | glialfibrillaryacidicprotein                                                    | 0.7319                                           | 0.002787                                                               | 0.3145                                                | -0.3612                                         | 0.4026                                                                | -0.5467                                              |
| A_55_P1986188 | 23854                          | 54849                          | Def8                         | differentiallyexpressed18FCP8                                                   | 0.6798                                           | 0.000135                                                               | -0.02472                                              | -0.002325                                       | 0.9964                                                                | 0.1394                                               |
| A_51_P255699  | 17392                          | 4314                           | Mmp3                         | matrixmetalloproteinase3                                                        | 0.6359                                           | 1.11E-06                                                               | 2.75                                                  | 0.02065                                         | 0.9542                                                                | -0.172                                               |
| A_51_P279100  | 19224                          | 5742                           | Ptgs1                        | prostaglandin-endoperoxidase synthase1                                          | 0.609                                            | 6.01E-06                                                               | -0.2276                                               | 0.3193                                          | 0.05643                                                               | -0.006356                                            |
| A_55_P2002557 | 20787                          | 6720                           | Sreb1                        | sterolregulatoryelementbindingtranscriptionfactor1                              | 0.599                                            | 0.0005014                                                              | 0.009386                                              | -0.005159                                       | 0.9938                                                                | 0.2883                                               |
| A_55_P2130090 | 71994                          | 1266                           | Cnn3                         | calponin3,acidic                                                                | 0.472                                            | 0.001974                                                               | 0.09737                                               | 0.02934                                         | 0.9506                                                                | -0.381                                               |
| A_55_P1955906 | 20846                          | 6772                           | Stat1                        | signaltransducerandactivatoroftranscription1                                    | -0.2382                                          | 0.009964                                                               | -0.187                                                | -0.1928                                         | 0.1574                                                                | -0.2986                                              |
| A_51_P167971  | 23821                          | 23621                          | Bace1                        | beta-siteAPPcleavingenzyme1                                                     | -0.2392                                          | 0.04303                                                                | 0.4867                                                | -0.0312                                         | 0.9317                                                                | 0.3311                                               |
| A_51_P239673  | 15452                          | 3251                           | Hprt                         | hypoxanthineuaninephosphoribosyltransferase                                     | -0.3619                                          | 0.003794                                                               | 0.5307                                                | -0.00682                                        | 0.9844                                                                | -0.08503                                             |
| A_55_P04961   | 18122                          | 4915                           | Nlr2                         | neurotrophilyrosinekinase, receptor, type2                                      | -0.6124                                          | 2.41E-05                                                               | -0.1595                                               | -0.09559                                        | 0.7702                                                                | -0.4127                                              |
| A_55_P1967216 | 11487                          | 102                            | Adam10                       | adamsintegrinandmetallopeptidase10                                              | -0.6486                                          | 0.001072                                                               | -0.01704                                              | 0.03093                                         | 0.9565                                                                | -0.2172                                              |
| A_55_P2016462 | 15945                          | 3627                           | Cxcl10                       | chemokine(C-X-C motif)ligand10                                                  | -0.6488                                          | 0.01341                                                                | -0.5447                                               | 0.152                                           | 0.8275                                                                | -0.1848                                              |
| A_55_P1981415 | 56637                          | 2932                           | Gsk3b                        | glycogen synthase kinase3beta                                                   | -0.7354                                          | 0.0001824                                                              | -0.02413                                              | -0.2574                                         | 0.4585                                                                | -0.3139                                              |
| A_55_P2052892 | 11798                          | 112401                         | Xiap                         | X-linkedinhibitorofapoptosis                                                    | -1.081                                           | 1.55E-06                                                               | -0.1925                                               | -0.01024                                        | 0.9879                                                                | -0.217                                               |
| A_66_P108267  | 116810                         | 121643                         | Foxn4                        | forkheadboxN4                                                                   | -1.13                                            | 1.07E-05                                                               | -0.8682                                               | -0.01521                                        | 0.9852                                                                | -0.2283                                              |
| A_55_P2054628 | 18189                          | 9378                           | Nrxn1                        | neurexin1                                                                       | -1.54                                            | 1.52E-06                                                               | -0.1601                                               | -0.02342                                        | 0.9809                                                                | 0.1198                                               |
| A_55_P2158227 | 11600                          | 284                            | Angpt1                       | angiotensin1                                                                    | -1.55                                            | 6.71E-06                                                               | 0.1321                                                | -0.1348                                         | 0.8808                                                                | -0.2283                                              |
| A_52_P306305  | 11641                          | NA                             | Akap2                        | Akinase(PRKA)anchorageprotein2                                                  | -1.572                                           | 3.43E-07                                                               | 0.346                                                 | -0.156                                          | 0.819                                                                 | -1.94                                                |
| A_55_P2085974 | 16000                          | 3479                           | Igf1                         | insulin-likegrowthfactor1                                                       | -1.691                                           | 1.49E-05                                                               | -0.6025                                               | -0.0309                                         | 0.9805                                                                | -0.4024                                              |
| A_55_P2017826 | 17863                          | 4602                           | Myb                          | myeloblastosisoncogene                                                          | -1.74                                            | 1.10E-14                                                               | -1.228                                                | 0.1681                                          | 0.53                                                                  | -0.1646                                              |
| A_55_P2001238 | 67684                          | 51747                          | Luc7l3                       | UC7-like3(S.terevisiae)                                                         | -1.886                                           | 1.18E-07                                                               | 0.2857                                                | -0.7362                                         | 0.08011                                                               | -0.001676                                            |
| A_51_P279038  | 19017                          | 10891                          | Ppargc1a                     | peroxisomeproliferativeactivatedreceptor, gamma,1 coactivator1alpa              | -1.903                                           | 3.78E-13                                                               | -0.2134                                               | -0.0568                                         | 0.912                                                                 | -2.05                                                |
| A_55_P2097478 | 14544                          | 9615                           | Gda                          | guaninedeaminase                                                                | 0.4641                                           | 0.02333                                                                | NA                                                    | 2.45624                                         | 5.76E-13                                                              | NA                                                   |
| A_55_P2026139 | 381680                         | NA                             | BC055004                     | cDNAsequence:BC055004                                                           | 0.7669                                           | 5.061E-08                                                              | NA                                                    | 2.44527                                         | 4.10E-20                                                              | NA                                                   |
| A_55_P2078633 | 12268                          | 721                            | Cab                          | complementcomponent8B(cholera toxin group)                                      | 0.2818                                           | 0.01119                                                                | NA                                                    | 2.22009                                         | 2.50E-19                                                              | NA                                                   |
| A_51_P341108  | 20732                          | 6692                           | Spint1                       | serineproteaseinhibitor,unitztype1                                              | 1.039                                            | 3.39E-09                                                               | NA                                                    | 1.61425                                         | 7.88E-13                                                              | NA                                                   |
| A_52_P363216  | 14538                          | 2651                           | Gcnt2                        | glucosaminyl(N-acetyl)transferase2, beta-branchingenzyme                        | 0.2039                                           | 0.05255                                                                | NA                                                    | 1.5205                                          | 2.35E-15                                                              | NA                                                   |
| A_52_P422494  | 246746                         | 146722                         | CD300lf                      | CD300antigenlikefamilymemberF                                                   | 0.9488                                           | 3.76E-11                                                               | NA                                                    | 1.48161                                         | 3.02E-15                                                              | NA                                                   |
| A_55_P1972605 | 11542                          | 140                            | Adora3                       | adenosineA3receptor                                                             | 0.6266                                           | 0.0004212                                                              | NA                                                    | 1.45518                                         | 4.05E-09                                                              | NA                                                   |
| A_51_P181341  | 117148                         | 54550                          | Necab2                       | N-terminalEF-handcalciumbindingprotein2                                         | 0.862                                            | 3.65E-02                                                               | NA                                                    | 1.42033                                         | 7.95E-03                                                              | NA                                                   |
| A_51_P346938  | 76905                          | 116844                         | Lrg1                         | leucine-richalpha-2-glycoprotein1                                               | 1.061                                            | 4.73E-11                                                               | NA                                                    | 1.39081                                         | 5.76E-13                                                              | NA                                                   |
| A_51_P488739  | 80885                          | 338442                         | Niacr1                       | niacinreceptor1                                                                 | 1.083                                            | 1.006E-09                                                              | NA                                                    | 1.39005                                         | 3.45E-11                                                              | NA                                                   |
| A_55_P1961270 | 12517                          | 971                            | Cd72                         | CD72antigen                                                                     | 1.056                                            | 1.90E-08                                                               | NA                                                    | 1.36002                                         | 8.77E-10                                                              | NA                                                   |
| A_55_P2100645 | 170458                         | 170589                         | Gpha2                        | glycoprotein hormone alpa2                                                      | 0.9042                                           | 0.01069                                                                | NA                                                    | 1.31596                                         | 4.19E-03                                                              | NA                                                   |
| A_55_P1963920 | 327957                         | 383235                         | A430084P0SR                  | RikenGDNA3430084P0S gene                                                        | 0.8221                                           | 2.992E-07                                                              | NA                                                    | 1.28548                                         | 2.68E-10                                                              | NA                                                   |
| A_51_P145785  | 11699                          | 259                            | Ambp                         | alpha2microglobulin/bikunin                                                     | 0.7032                                           | 0.00003485                                                             | NA                                                    | 1.25662                                         | 1.36E-08                                                              | NA                                                   |
| A_55_P2085142 | 20750                          | 6696                           | Sppl                         | secreted phosphoprotein1                                                        | 0.4706                                           | 0.03912                                                                | NA                                                    | 1.2324                                          | 3.50E-05                                                              | NA                                                   |
| A_51_P234864  | 94282                          | 94097                          | Sfn5s                        | sideroflexin5                                                                   | 0.008232                                         | 9.57E-01                                                               | NA                                                    | 1.19957                                         | 4.05E-12                                                              | NA                                                   |
| A_55_P2013143 | 77411                          | 80004                          | Esrp2                        | epithelialsplicingregulatoryprotein2                                            | 0.7225                                           | 5.44E-02                                                               | NA                                                    | 1.19871                                         | 1.46E-02                                                              | NA                                                   |
| A_55_P2111355 | 353156                         | 51162                          | Egfl7                        | EGF-like domain7                                                                | 0.1588                                           | 3.62E-01                                                               | -0.0253                                               | -1.378                                          | 1.78E-09                                                              | -1.108                                               |

Table S1. Significantly different genes in astrocyte and/or microglia enriched culture samples.

| GO analysis in IL-6+sIL-6R treated astrocytes |                                                               |          |           |               |         |                                                                          |
|-----------------------------------------------|---------------------------------------------------------------|----------|-----------|---------------|---------|--------------------------------------------------------------------------|
| Gene/Ontology                                 | GO term                                                       | P-value  | OddsRatio | Ontology/Size | Overlap | Gene/Symbols/Category                                                    |
| GO:0006954                                    | inflammatory response                                         | 5.72E-08 | 26.9      | 343           | 7       | Hp,Il4ra,Saa1,Saa3,Ccl12,Sphk1,Serpina3n                                 |
| GO:0006953                                    | acute-phase response                                          | 1.37E-07 | 111       | 40            | 4       | Hp,Saa1,Saa3,Serpina3n                                                   |
| GO:0006950                                    | response to stress                                            | 4.99E-06 | 11.7      | 1079          | 8       | C3,Il4ra,Saa1,Saa3,Ccl12,Sphk1,Serpina3n,Tgm2                            |
| GO:0007275                                    | multicellular organismal development                          | 1.49E-05 | 6.06      | 3668          | 14      | Bcl3,C3,Cebpd,Socs3,Hp,Hspb1,Il4ra,Pirb,Ccl12,Sphk1,Tgm1,Tgm2,Timp1,Cd8n |
| GO:0016265                                    | death                                                         | 3.10E-05 | 7.44      | 1488          | 9       | Bcl3,Hp,Hspb1,Lcn2,Ccl12,Sphk1,Tgm2,Timp1,Angptl4                        |
| GO:0007243                                    | intracellular protein kinase cascade                          | 3.74E-05 | 9.54      | 831           | 7       | Bcl3,C3,Socs3,Hspb1,Ccl12,Sphk1,Tgm2                                     |
| GO:0043086                                    | negative regulation of catalytic activity                     | 3.92E-05 | 11.7      | 559           | 6       | Hp,Hspb1,Serpina3n,Timp1,Angptl4,Wfdc2                                   |
| GO:0002250                                    | adaptive immune response                                      | 6.58E-05 | 21.7      | 187           | 4       | Bcl3,C3,Il4ra,Pirb                                                       |
| GO:0001819                                    | positive regulation of cytokine production                    | 8.05E-05 | 20.6      | 197           | 4       | Bcl3,C3,Hspb1,Il4ra                                                      |
| GO:0002376                                    | immune system process                                         | 0.000131 | 6.75      | 1379          | 8       | Bcl3,C3,Il4ra,Lcn2,Pirb,Ptx3,Ccl12,Timp1                                 |
| GO:1900407                                    | regulation of cellular response to oxidative stress           | 0.000141 | 141       | 15            | 2       | Hp,Hspb1                                                                 |
| GO:0045766                                    | positive regulation of angiogenesis                           | 0.000157 | 33.2      | 89            | 3       | C3,Hspb1,Sphk1                                                           |
| GO:0043067                                    | regulation of programmed cell death                           | 0.000169 | 7.41      | 1056          | 7       | Bcl3,Hspb1,Ccl12,Sphk1,Tgm2,Timp1,Angptl4                                |
| GO:0019724                                    | B cell mediated immunity                                      | 0.00019  | 31        | 95            | 3       | Bcl3,C3,Pirb                                                             |
| GO:0042832                                    | defense response to protozoan                                 | 0.000367 | 83.1      | 24            | 2       | Bcl3,Il4ra                                                               |
| GO:0018149                                    | peptide cross-linking                                         | 0.000432 | 76.1      | 26            | 2       | Tgm1,Tgm2                                                                |
| GO:0042092                                    | type 2 immune response                                        | 0.000466 | 73.1      | 27            | 2       | Bcl3,Il4ra                                                               |
| GO:0060548                                    | negative regulation of cell death                             | 0.000561 | 8.76      | 589           | 5       | Bcl3,Ccl12,Sphk1,Timp1,Angptl4                                           |
| GO:0032651                                    | regulation of interleukin-1 beta production                   | 0.000616 | 63        | 31            | 2       | Hspb1,Sphk1                                                              |
| GO:0042093                                    | T-helper cell differentiation                                 | 0.000698 | 58.9      | 33            | 2       | Bcl3,Il4ra                                                               |
| GO:0051707                                    | response to other organism                                    | 0.000705 | 19.8      | 167           | 3       | Il4ra,Lcn2,Ptx3                                                          |
| GO:0042088                                    | T-helper cell type immune response                            | 0.000741 | 57.1      | 34            | 2       | Bcl3,Il4ra                                                               |
| GO:0034097                                    | response to cytokine stimulus                                 | 0.00075  | 11.3      | 354           | 4       | Pirb,Ccl12,Sphk1,Serpina3n                                               |
| GO:0002293                                    | alpha-beta T cell differentiation involved in immune response | 0.000786 | 55.3      | 35            | 2       | Bcl3,Il4ra                                                               |
| GO:0043122                                    | regulation of f-kinase/NF-kappaB cascade                      | 0.000859 | 18.3      | 159           | 3       | Hspb1,Sphk1,Tgm2                                                         |

  

| GO analysis in IL-6+sIL-6R treated microglia |                                                           |          |           |               |         |                                         |
|----------------------------------------------|-----------------------------------------------------------|----------|-----------|---------------|---------|-----------------------------------------|
| Gene/Ontology                                | GO term                                                   | P-value  | OddsRatio | Ontology/Size | Overlap | Gene/Symbols/Category                   |
| GO:0006953                                   | acute-phase response                                      | 6.25E-10 | 167       | 40            | 5       | Fn1,Hp,Il1b,Saa1,Saa3                   |
| GO:0006954                                   | inflammatory response                                     | 8.02E-07 | 24.5      | 343           | 6       | Fn1,Hp,Saa1,Saa3,Ccl12,Ccl8             |
| GO:0050995                                   | negative regulation of lipid metabolic process            | 0.000173 | 125       | 18            | 2       | Il1b,Niacr1                             |
| GO:0001944                                   | vasculature development                                   | 0.000221 | 10.9      | 526           | 5       | Socs3,Fn1,Il1b,Ccl12,Spint1             |
| GO:0060669                                   | embryonic placental morphogenesis                         | 0.00026  | 100       | 22            | 2       | Socs3,Spint1                            |
| GO:0009605                                   | response to external stimulus                             | 0.000351 | 7.83      | 914           | 6       | Adora3,Fn1,Il1b,Ccl12,Ccl8,Spp1         |
| GO:0046627                                   | negative regulation of insulin receptor signaling pathway | 0.000365 | 83.4      | 26            | 2       | Socs3,Il1b                              |
| GO:0060674                                   | placental blood vessel development                        | 0.00052  | 69        | 31            | 2       | Socs3,Spint1                            |
| GO:0044060                                   | regulation of endocrine process                           | 0.000555 | 66.7      | 32            | 2       | Il1b,Niacr1                             |
| GO:0060986                                   | endocrine hormone secretion                               | 0.000664 | 60.6      | 35            | 2       | Il1b,Niacr1                             |
| GO:0040011                                   | locomotion                                                | 0.000742 | 6.75      | 1052          | 6       | Adora3,Fn1,Il1b,Ccl12,Ccl8,Spp1         |
| GO:0006955                                   | immune response                                           | 0.000776 | 8.23      | 692           | 5       | Adora3,C4b,Il1b,Ccl12,Ccl8              |
| GO:0031663                                   | lipopolysaccharide-mediated signaling pathway             | 0.000783 | 55.6      | 38            | 2       | Il1b,Ccl12                              |
| GO:0042063                                   | gliogenesis                                               | 0.00084  | 18.5      | 172           | 3       | Fn1,Il1b,Ccl12                          |
| GO:1900076                                   | regulation of cellular response to insulin stimulus       | 0.0012   | 44.4      | 47            | 2       | Socs3,Il1b                              |
| GO:1901701                                   | cellular response to oxygen-containing compound           | 0.00121  | 9.95      | 440           | 4       | Socs3,Hp,Il1b,Ccl12                     |
| GO:0060711                                   | labyrinthine layer development                            | 0.00125  | 43.5      | 48            | 2       | Socs3,Spint1                            |
| GO:0072359                                   | circulatory system development                            | 0.00127  | 7.34      | 772           | 5       | Socs3,Fn1,Il1b,Ccl12,Spint1             |
| GO:0030593                                   | neutrophil chemotaxis                                     | 0.00141  | 40.8      | 51            | 2       | Il1b,Spp1                               |
| GO:0051341                                   | regulation of oxidoreductase activity                     | 0.00146  | 40        | 52            | 2       | Hp,Il1b                                 |
| GO:0001763                                   | morphogenesis of branching structure                      | 0.00147  | 15.2      | 209           | 3       | Socs3,Il1b,Spint1                       |
| GO:0006950                                   | response to stress                                        | 0.00152  | 4.64      | 2178          | 8       | Adora3,Fn1,Hp,Il1b,Saa1,Saa3,Ccl12,Ccl8 |
| GO:0016477                                   | cell migration                                            | 0.00154  | 7.01      | 807           | 5       | Adora3,Fn1,Il1b,Ccl12,Spp1              |
| GO:0009914                                   | hormone transport                                         | 0.00171  | 14.4      | 220           | 3       | Adora3,Il1b,Niacr1                      |
| GO:0051952                                   | regulation of amine transport                             | 0.00207  | 33.3      | 62            | 2       | Adora3,Il1b                             |

**Table S2. GO analysis in IL-6+sIL-6R treated astrocytes and microglia.**

**GSEA results in IL-6+sIL-6R treated astrocytes**

| <b>Gene Set</b>                                                     | <b>Prop of genes in set up-regulated</b> | <b>ROAST p-value</b> |
|---------------------------------------------------------------------|------------------------------------------|----------------------|
| Top 25 IL-6+sIL-6R up-regulated genes in astrocytes                 | 1                                        | 0.0001               |
| Top 25 IL-6+sIL-6R up-regulated genes in microglia                  | 0.96                                     | 0.0001               |
| IL-6-mediated signaling events (Pathway Interaction Database)       | 0.415                                    | 0.0001               |
| Genes involved in Interleukin-6 signaling (Reactome)                | 0.5                                      | 0.0001               |
| IL-6 signaling pathway (Biocarta)                                   | 0.474                                    | 0.0001               |
| Genes up-regulated in normal fibroblasts in response to IL-6 (Dasu) | 0.569                                    | 0.0001               |

**GSEA results in IL-6+sIL-6R treated microglia**

| <b>Gene Set</b>                                                     | <b>Prop of genes in set up-regulated</b> | <b>ROAST p-value</b> |
|---------------------------------------------------------------------|------------------------------------------|----------------------|
| Top 25 IL-6+sIL-6R up-regulated genes in astrocytes                 | 0.76                                     | 0.0001               |
| Top 25 IL-6+sIL-6R up-regulated genes in microglia                  | 1                                        | 0.0001               |
| IL-6-mediated signaling events (Pathway Interaction Database)       | 0.293                                    | 0.0001               |
| Genes involved in Interleukin-6 signaling (Reactome)                | 0.5                                      | 0.0001               |
| IL-6 signaling pathway (Biocarta)                                   | 0.368                                    | 0.0005               |
| Genes up-regulated in normal fibroblasts in response to IL-6 (Dasu) | 0.314                                    | 0.0006               |

**Table S3. GSEA results in IL-6+sIL-6R treated astrocytes and microglia.**

**Clinical GSEA results A358+vs A358 in all AD cases**

| Gene Set                                                            | Number of Genes in Set | Prop of genes in Set up-regulated | ROAST p-value |
|---------------------------------------------------------------------|------------------------|-----------------------------------|---------------|
| Top 25 IL-6+sIL-6R up-regulated genes in astrocytes                 | 23                     | 0.435                             | 0.0028        |
| Top 25 IL-6+sIL-6R up-regulated genes in microglia                  | 20                     | 0.3                               | 0.0108        |
| IL-6-mediated signaling events (Pathway Interaction Database)       | 47                     | 0.17                              | 0.0646        |
| Genes involved in Interleukin-6 signaling (Reactome)                | 10                     | 0.2                               | 0.3123        |
| IL-6 signaling pathway (Biocarta)                                   | 22                     | 0.136                             | 0.1887        |
| Genes up-regulated in normal fibroblasts in response to IL-6 (Dasu) | 59                     | 0.241                             | 0.0283        |

**Clinical GSEA results A358+vs A358 in APOE4 AD cases**

| Gene Set                                                            | Number of Genes in Set | Prop of genes in Set up-regulated | ROAST p-value |
|---------------------------------------------------------------------|------------------------|-----------------------------------|---------------|
| Top 25 IL-6+sIL-6R up-regulated genes in astrocytes                 | 23                     | 0.348                             | 0.0194        |
| Top 25 IL-6+sIL-6R up-regulated genes in microglia                  | 20                     | 0.3                               | 0.1072        |
| IL-6-mediated signaling events (Pathway Interaction Database)       | 47                     | 0.191                             | 0.0777        |
| Genes involved in Interleukin-6 signaling (Reactome)                | 10                     | 0.3                               | 0.1308        |
| IL-6 signaling pathway (Biocarta)                                   | 22                     | 0.227                             | 0.1896        |
| Genes up-regulated in normal fibroblasts in response to IL-6 (Dasu) | 59                     | 0.19                              | 0.0816        |

**Clinical GSEA results A358+vs A358 in APOE4-AD cases**

| Gene Set                                                            | Number of Genes in Set | Prop of genes in Set up-regulated | ROAST p-value |
|---------------------------------------------------------------------|------------------------|-----------------------------------|---------------|
| Top 25 IL-6+sIL-6R up-regulated genes in astrocytes                 | 23                     | 0.348                             | 0.0398        |
| Top 25 IL-6+sIL-6R up-regulated genes in microglia                  | 20                     | 0.2                               | 0.0649        |
| IL-6-mediated signaling events (Pathway Interaction Database)       | 47                     | 0.106                             | 0.2591        |
| Genes involved in Interleukin-6 signaling (Reactome)                | 10                     | 0                                 | 0.8431        |
| IL-6 signaling pathway (Biocarta)                                   | 22                     | 0.091                             | 0.4701        |
| Genes up-regulated in normal fibroblasts in response to IL-6 (Dasu) | 59                     | 0.172                             | 0.2989        |

**Clinical GSEA results A358+APOE4+vs APOE-AD cases**

| Gene Set                                                            | Number of Genes in Set | Prop of genes in Set up-regulated | ROAST p-value |
|---------------------------------------------------------------------|------------------------|-----------------------------------|---------------|
| Top 25 IL-6+sIL-6R up-regulated genes in astrocytes                 | 23                     | 0.13                              | 0.1347        |
| Top 25 IL-6+sIL-6R up-regulated genes in microglia                  | 20                     | 0.05                              | 0.8726        |
| IL-6-mediated signaling events (Pathway Interaction Database)       | 47                     | 0.085                             | 0.3674        |
| Genes involved in Interleukin-6 signaling (Reactome)                | 10                     | 0.2                               | 0.2358        |
| IL-6 signaling pathway (Biocarta)                                   | 22                     | 0.045                             | 0.7115        |
| Genes up-regulated in normal fibroblasts in response to IL-6 (Dasu) | 59                     | 0.086                             | 0.5165        |

**Genotype frequencies**

**AD cases**

| IL6R Genotype | APOE Genotype |    |    |    |    |
|---------------|---------------|----|----|----|----|
|               | 22            | 23 | 33 | 34 | 44 |
| D358/D358     | 0             | 1  | 7  | 20 | 7  |
| A358/D358     | 0             | 0  | 14 | 21 | 10 |
| A358/A358     | 0             | 0  | 5  | 7  | 2  |

**NHC cases**

| IL6R Genotype | APOE Genotype |    |    |    |    |
|---------------|---------------|----|----|----|----|
|               | 22            | 23 | 33 | 34 | 44 |
| D358/D358     | 3             | 2  | 29 | 9  | 1  |
| A358/D358     | 1             | 3  | 36 | 7  | 3  |
| A358/A358     | 2             | 2  | 19 | 7  | 0  |

**Table S4. GSEA results in human temporal cortex LOAD cases.**

|                  | A358*     | D358      | A358†Homozygotes |             | Heterozygotes |             | D358†Homozygotes |             | OddsRatio‡ relative to § | OddsRatio‡ relative to § |
|------------------|-----------|-----------|------------------|-------------|---------------|-------------|------------------|-------------|--------------------------|--------------------------|
|                  | Frequency | Frequency | Frequency        | Individuals | Frequency     | Individuals | Frequency        | Individuals |                          |                          |
| All Controls     | 0.407     | 0.593     | 0.175            | 522         | 0.464         | 1382        | 0.361            | 1077        |                          |                          |
| APOE4+ Controls^ | 0.392     | 0.608     | 0.167            | 123         | 0.449         | 330         | 0.384            | 282         |                          |                          |
| All Cases        | 0.410     | 0.590     | 0.164            | 675         | 0.493         | 2030        | 0.344            | 1416        | 1.01                     | 1.08                     |
| APOE4- Cases     | 0.402     | 0.598     | 0.156            | 258         | 0.493         | 818         | 0.351            | 582         | 0.98                     | NA                       |
| APOE3/4 Cases    | 0.414     | 0.586     | 0.167            | 311         | 0.495         | 923         | 0.339            | 632         | 1.03                     | 1.10                     |
| APOE4/4 Cases    | 0.420     | 0.580     | 0.178            | 106         | 0.484         | 289         | 0.338            | 202         | 1.05                     | 1.12                     |

\*A358 is C allele of rs228145 and D358 is A allele of rs228145

^APOE4+ individuals carry either the APOE3/4 or APOE4/4 genotype, APOE4- individuals not carrying the APOE3/4 or APOE4/4 genotype

**Table S5. Frequency of *IL6R* A358 and D358 by *APOE* status.**

|                 | Age   | A358      | D358      | A358      |             | Heterozygotes |             | D358      |             | Odds Ratio relative to APOE4+ controls |
|-----------------|-------|-----------|-----------|-----------|-------------|---------------|-------------|-----------|-------------|----------------------------------------|
|                 |       | Frequency | Frequency | Frequency | Individuals | Frequency     | Individuals | Frequency | Individuals |                                        |
| APOE4+ Controls | All   | 0.392     | 0.608     | 0.167     | 123         | 0.449         | 330         | 0.384     | 282         |                                        |
| APOE4+ Cases    | All   | 0.415     | 0.585     | 0.169     | 417         | 0.492         | 1212        | 0.339     | 834         | 1.10                                   |
|                 | <=65  | 0.431     | 0.569     | 0.184     | 115         | 0.495         | 310         | 0.321     | 201         | 1.18                                   |
|                 | 66-74 | 0.413     | 0.587     | 0.163     | 174         | 0.499         | 532         | 0.338     | 360         | 1.09                                   |
|                 | >=75  | 0.406     | 0.594     | 0.166     | 128         | 0.480         | 370         | 0.354     | 273         | 1.06                                   |

\*A358 allele frequency 2228145 and D358 allele frequency 2228145

^APOE4+ individuals carrying either the APOE3/4 or APOE4/4 genotype, APOE4- individuals not carrying the APOE3/4 or APOE4/4 genotype

**Table S6. Frequency of *IL6R* A358 and D358 by different ages of AD cases.**



| Study           | Case@3e4 | Case@4e4 | Case@2e4 | Case@total | Ctrl@3e4 | Ctrl@4e4 | Ctrl@2e4 | Ctrl@total | Total      | Genotyping                      | SNPs       |
|-----------------|----------|----------|----------|------------|----------|----------|----------|------------|------------|---------------------------------|------------|
| Primary         | 68       | 35       |          | <b>103</b> | 90       | 19       |          | 109        | <b>212</b> | HumanOmni1-Quad_v1-0_B          | 1140419    |
| US@replication1 | 37       | 21       |          | <b>58</b>  | 255      | 18       | 2        | 275        | <b>333</b> | HumanOmni2.5-8v1_A              | 2379855    |
| US@replication2 | 132      | 74       | 1        | <b>207</b> | 149      | 12       | 18       | 179        | <b>386</b> | Human610-Quadv1_B               | 620901     |
| US@replication3 | 453      | 249      |          | <b>702</b> | 232      | 26       |          | 258        | <b>960</b> | HumanExome-12v1_A               | 247870     |
| Icelandic       | 44       | 31       |          | <b>75</b>  | 37       | 38       |          | 75         | <b>150</b> | Illumina@HiSeq@Whole@genome@seq | 16,566,811 |

**Table S7. Summary of samples in the genotype datasets used to test for association.**
